# Supplementary material
Source: publisher figshare collection journal article supplement (https://tandf.figshare.com/articles/dataset/_/9249770)
Supplement: Supplementary file 1 [file 2 › Supplementary Quality assessment.pdf]

Supplementary Table I – Downs and Black checklist for measuring study quality. Yes = 1, No = 0, Unable to determine (UTD) = 0.

|                                                                                                             | Mousa,<br>2019 | Gunter,<br>2018 | Duscha,<br>2018 | McDermott,<br>2018 | Davins Riu,<br>2018 | Normahani,<br>2018 |
|-------------------------------------------------------------------------------------------------------------|----------------|-----------------|-----------------|--------------------|---------------------|--------------------|
| <b>Reporting</b>                                                                                            |                |                 |                 |                    |                     |                    |
| 1. Aim clearly described? (Yes/No)                                                                          | yes            | yes             | yes             | yes                | yes                 | yes                |
| 2. Main outcomes clearly described? (Yes/No)                                                                | yes            | yes             | yes             | yes                | yes                 | yes                |
| 3. Patient characteristics for inclusion clearly described? (Yes/No)                                        | yes            | yes             | yes             | yes                | yes                 | yes                |
| 4. Interventions clearly described? (Yes/No)                                                                | yes            | yes             | yes             | yes                | yes                 | yes                |
| 5. Distributions of principal confounders in each group clearly described? (Yes/Partially/No <sup>1</sup> ) | yes            | yes             | yes             | yes                | yes                 | yes                |
| 6. Main findings clearly described? (Yes/No)                                                                | yes            | yes             | yes             | yes                | no                  | yes                |
| 7. Random variability main outcomes (IQR of SE/SD/CI) reported? (Yes/No)                                    | yes            | no              | yes             | yes                | yes                 | yes                |
| 8. Adverse events reported? (Yes/No)                                                                        | yes            | yes             | yes             | yes                | yes                 | yes                |
| 9. Characteristics patients lost to follow-up reported? (Yes/No)                                            | yes            | yes             | yes             | yes                | yes                 | yes                |
| 10. Actual probability values reported? (Yes/No)                                                            | yes            | UTD             | no              | yes                | yes                 | yes                |
| <b>External validity</b>                                                                                    |                |                 |                 |                    |                     |                    |
| 11. Subjects asked representative? (Yes/No/UTD)                                                             | yes            | yes             | no              | yes                | yes                 | yes                |
| 12. Subjects participated representative? (Yes/No/UTD)                                                      | yes            | yes             | yes             | yes                | yes                 | yes                |
| 13. Staff, places and facilities representative? (Yes/No/UTD)                                               | yes            | yes             | yes             | yes                | yes                 | yes                |
| <b>Internal validity</b>                                                                                    |                |                 |                 |                    |                     |                    |
| 14. Attempt to blind subjects to intervention? (Yes/No/UTD)                                                 | no             | no              | no              | no                 | no                  | no                 |
| 15. Attempt to blind measurement main outcomes? (Yes/No/UTD)                                                | yes            | no              | no              | yes                | no                  | no                 |
| 16. "Data dredging" made clear? (Yes/No/UTD)                                                                | yes            | yes             | yes             | yes                | no                  | yes                |
| 17. Adjustment different lengths in follow-up? (Yes/No/UTD)                                                 | yes            | no              | yes             | yes                | yes                 | no                 |
| 18. Statistical tests appropriate? (Yes/No/UTD)                                                             | yes            | yes             | yes             | yes                | no                  | yes                |
| 19. Compliance with intervention reliable? (Yes/No/UTD)                                                     | yes            | no              | yes             | no                 | yes                 | no                 |
| 20. Main outcome measures accurate? (Yes/No/UTD)                                                            | yes            | yes             | yes             | yes                | yes                 | yes                |
| <b>Internal validity - confounding (selection bias)</b>                                                     |                |                 |                 |                    |                     |                    |
| 21. Patients from intervention and control group recruited from same population? (Yes/No/UTD)               | yes            | UTD             | yes             | yes                | yes                 | yes                |
| 22. Patients from intervention and control group recruited over same time period? (Yes/No/UTD)              | yes            | UTD             | yes             | yes                | yes                 | yes                |
| 23. Patients randomized to intervention groups? (Yes/No/UTD)                                                | yes            | UTD             | yes             | yes                | yes                 | yes                |
| 24. Randomization concealed from both patients and staff? (Yes/No/UTD)                                      | yes            | UTD             | no              | yes                | no                  | no                 |
| 25. Adequate adjustment for confoundings? (Yes/No/UTD)                                                      | yes            | UTD             | yes             | yes                | yes                 | yes                |
| 26. Losses of patients to follow-up taken into account? (Yes/No/UTD)                                        | yes            | yes             | yes             | yes                | no                  | no                 |
| <b>Power</b>                                                                                                |                |                 |                 |                    |                     |                    |
| 27. Sufficient power to detect clinically important effect?                                                 | no             | no              | no              | no                 | no                  | no                 |
| <b>Score</b>                                                                                                | 25             | 15              | 21              | 24                 | 19                  | 20                 |

<sup>1</sup>: Yes = 2, Partially = 1, No = 0.
