# Supplementary material
Source: publisher figshare collection journal article supplement (https://tandf.figshare.com/articles/dataset/_/9249770)
Supplement: Supplementary file 1 [file 2 › Supplementary Search.pdf]

### Search strategy in PubMed (11<sup>th</sup> March 2019)

Filter: last 10 years (2009-2019)

| Search    | Query                                                                                                                                                                                                                                                                                                                                                                                                                                                                                                                                                                                                                                                                                                                                                                                                                                                     | Results       |
|-----------|-----------------------------------------------------------------------------------------------------------------------------------------------------------------------------------------------------------------------------------------------------------------------------------------------------------------------------------------------------------------------------------------------------------------------------------------------------------------------------------------------------------------------------------------------------------------------------------------------------------------------------------------------------------------------------------------------------------------------------------------------------------------------------------------------------------------------------------------------------------|---------------|
| <b>#3</b> | #1 AND #2                                                                                                                                                                                                                                                                                                                                                                                                                                                                                                                                                                                                                                                                                                                                                                                                                                                 | <b>452</b>    |
| <b>#2</b> | "Peripheral Arterial Disease"[Mesh] OR "Aorta"[Mesh] OR peripheral arterial disease*[tiab] OR peripheral artery disease*[tiab] OR vascular*[tiab] OR aort*[tiab] OR arter*[tiab] OR peripheral ischemi*[tiab] OR limb ischemi*[tiab] OR peripheral occlusive disease*[tiab]                                                                                                                                                                                                                                                                                                                                                                                                                                                                                                                                                                               | <b>434581</b> |
| <b>#1</b> | "Telemedicine"[Mesh] OR "Wearable Electronic Devices"[Mesh] OR "Mobile Applications"[Mesh] OR "Computers, Handheld"[Mesh]<br>OR<br>mobile app* [tiab] OR mobile health intervention* [tiab] OR eHealth*[tiab]<br>OR e-health*[tiab] OR mhealth*[tiab] OR m-health*[tiab] OR mobile health*[tiab] OR telehealth*[tiab] OR tele-health*[tiab] OR telemedic*[tiab] OR tele-medic*[tiab]<br>OR<br>econsult*[tiab] OR e-consult*[tiab] OR teleconsult*[tiab] OR tele-consult*[tiab] OR remote consult*[tiab] OR smartphone* [tiab]<br>OR<br>telemonitor*[tiab] OR tele-monitor*[tiab] OR wearable device*[tiab] OR wearable sensor*[tiab] OR wireless monitor*[tiab] OR wireless measure*[tiab] OR fitbit [tiab] OR smartwatch*[tiab] OR worn sensor*[tiab] OR worn biosensor*[tiab] OR patch sensor*[tiab] OR smart sensor*[tiab] OR wearable technol* [tiab] | <b>40468</b>  |

### Search strategy in CINAHL (11<sup>th</sup> March 2019)

Limit to: last 10 years (2009-2019)

| Search    | Query     | Results    |
|-----------|-----------|------------|
| <b>#3</b> | #1 AND #2 | <b>278</b> |

|           |                                                                                                                                                                                                                                                                                                                                                                                                                                                                                                                                                                                                                                                                                                          |               |
|-----------|----------------------------------------------------------------------------------------------------------------------------------------------------------------------------------------------------------------------------------------------------------------------------------------------------------------------------------------------------------------------------------------------------------------------------------------------------------------------------------------------------------------------------------------------------------------------------------------------------------------------------------------------------------------------------------------------------------|---------------|
| <b>#2</b> | MH "Peripheral Vascular Diseases" OR MH "Aorta+" OR "peripheral arterial disease*" OR "peripheral artery disease*" OR "vascular*" OR "aort*" OR "arter*" OR "peripheral ischemi*" OR "limb ischemi*" OR "peripheral occlusive disease*"                                                                                                                                                                                                                                                                                                                                                                                                                                                                  | <b>159708</b> |
| <b>#1</b> | MH "Telehealth+" OR MH "Wearable Sensors" OR MH "Mobile Applications" OR MH "Computers, Hand-Held"<br>OR<br>"mobile app*" OR "mobile health intervention*" OR "eHealth*" OR "e-health*" OR "mhealth*" OR "m-health*" OR "mobile health*" OR "telehealth*" OR "tele-health*" OR "telemedic*" OR "tele-medic*" OR<br>OR<br>"econsult*" OR "e-consult*" OR "teleconsult*" OR "tele-consult*" OR "remote consult*" OR "smartphone*" OR<br>OR<br>"telemonitor*" OR "tele-monitor*" OR "wearable device*" OR "wearable sensor*" OR "wireless monitor*" OR "wireless measure*" OR "fitbit" OR "smartwatch*" OR "worn sensor*" OR "worn biosensor*" OR "patch sensor*" OR "smart sensor*" OR "wearable technol*" | <b>29257</b>  |

### Search strategy in Embase (11<sup>th</sup> March 2019)

Filter: last 10 years (2009-2019)

Publication type: Article

| Search    | Query                                                                                                                                                                                                                                                                                                                                                                                                                                                                                                                                                                                                  | Results       |
|-----------|--------------------------------------------------------------------------------------------------------------------------------------------------------------------------------------------------------------------------------------------------------------------------------------------------------------------------------------------------------------------------------------------------------------------------------------------------------------------------------------------------------------------------------------------------------------------------------------------------------|---------------|
| <b>#3</b> | #1 AND #2                                                                                                                                                                                                                                                                                                                                                                                                                                                                                                                                                                                              | <b>519</b>    |
| <b>#2</b> | 'peripheral vascular disease'/de OR 'peripheral occlusive artery disease'/exp OR 'aorta'/exp OR 'peripheral arterial disease*':ab,ti OR 'peripheral artery disease*':ab,ti OR 'vascular*':ab,ti OR 'aort*':ab,ti OR 'arter*':ab,ti OR 'peripheral ischemi*':ab,ti OR 'limb ischemi*':ab,ti OR 'peripheral occlusive disease*':ab,ti                                                                                                                                                                                                                                                                    | <b>484425</b> |
| <b>#1</b> | 'telehealth'/de OR 'telemedicine'/de OR 'telemonitoring'/exp OR 'teleconsultation'/exp OR 'telenursing'/exp OR 'mobile application'/exp OR 'tablet computer'/exp<br>OR<br>'mobile app*':ab,ti OR 'mobile health intervention*':ab,ti OR 'eHealth*':ab,ti OR 'e-health*':ab,ti OR 'mhealth*':ab,ti OR 'm-health*':ab,ti OR 'mobile health*':ab,ti OR 'telehealth*':ab,ti OR 'tele-health*':ab,ti OR 'telemedic*':ab,ti OR 'tele-medic*':ab,ti<br>OR<br>'econsult*':ab,ti OR 'e-consult*':ab,ti OR 'teleconsult*':ab,ti OR 'tele-consult*':ab,ti OR 'remote consult*':ab,ti OR 'smartphone*':ab,ti<br>OR | <b>27275</b>  |

|  |                                                                                                                                                                                                                                                                                                                                                        |  |
|--|--------------------------------------------------------------------------------------------------------------------------------------------------------------------------------------------------------------------------------------------------------------------------------------------------------------------------------------------------------|--|
|  | 'telemonitor*':ab,ti OR 'tele-monitor*':ab,ti OR 'wearable device*':ab,ti<br>OR 'wearable sensor*':ab,ti OR 'wireless monitor*':ab,ti OR 'wireless<br>measure*':ab,ti OR 'fitbit':ab,ti OR 'smartwatch*':ab,ti OR 'worn<br>sensor*':ab,ti OR 'worn biosensor*':ab,ti OR 'patch sensor*':ab,ti OR<br>'smart sensor*':ab,ti OR 'wearable technol*':ab,ti |  |
|--|--------------------------------------------------------------------------------------------------------------------------------------------------------------------------------------------------------------------------------------------------------------------------------------------------------------------------------------------------------|--|
